# Supplementary material for: Favorable Effect of Pemafibrate on Insulin Resistance and β-Cell Function in Subjects with Type 2 Diabetes and Hypertriglyceridemia: A Subanalysis of the PARM-T2D Study
Source: MDPI journal article supplement (doi:10.3390/pharmaceutics15071838), 2023-06-27
Supplement: s1 [file s1]

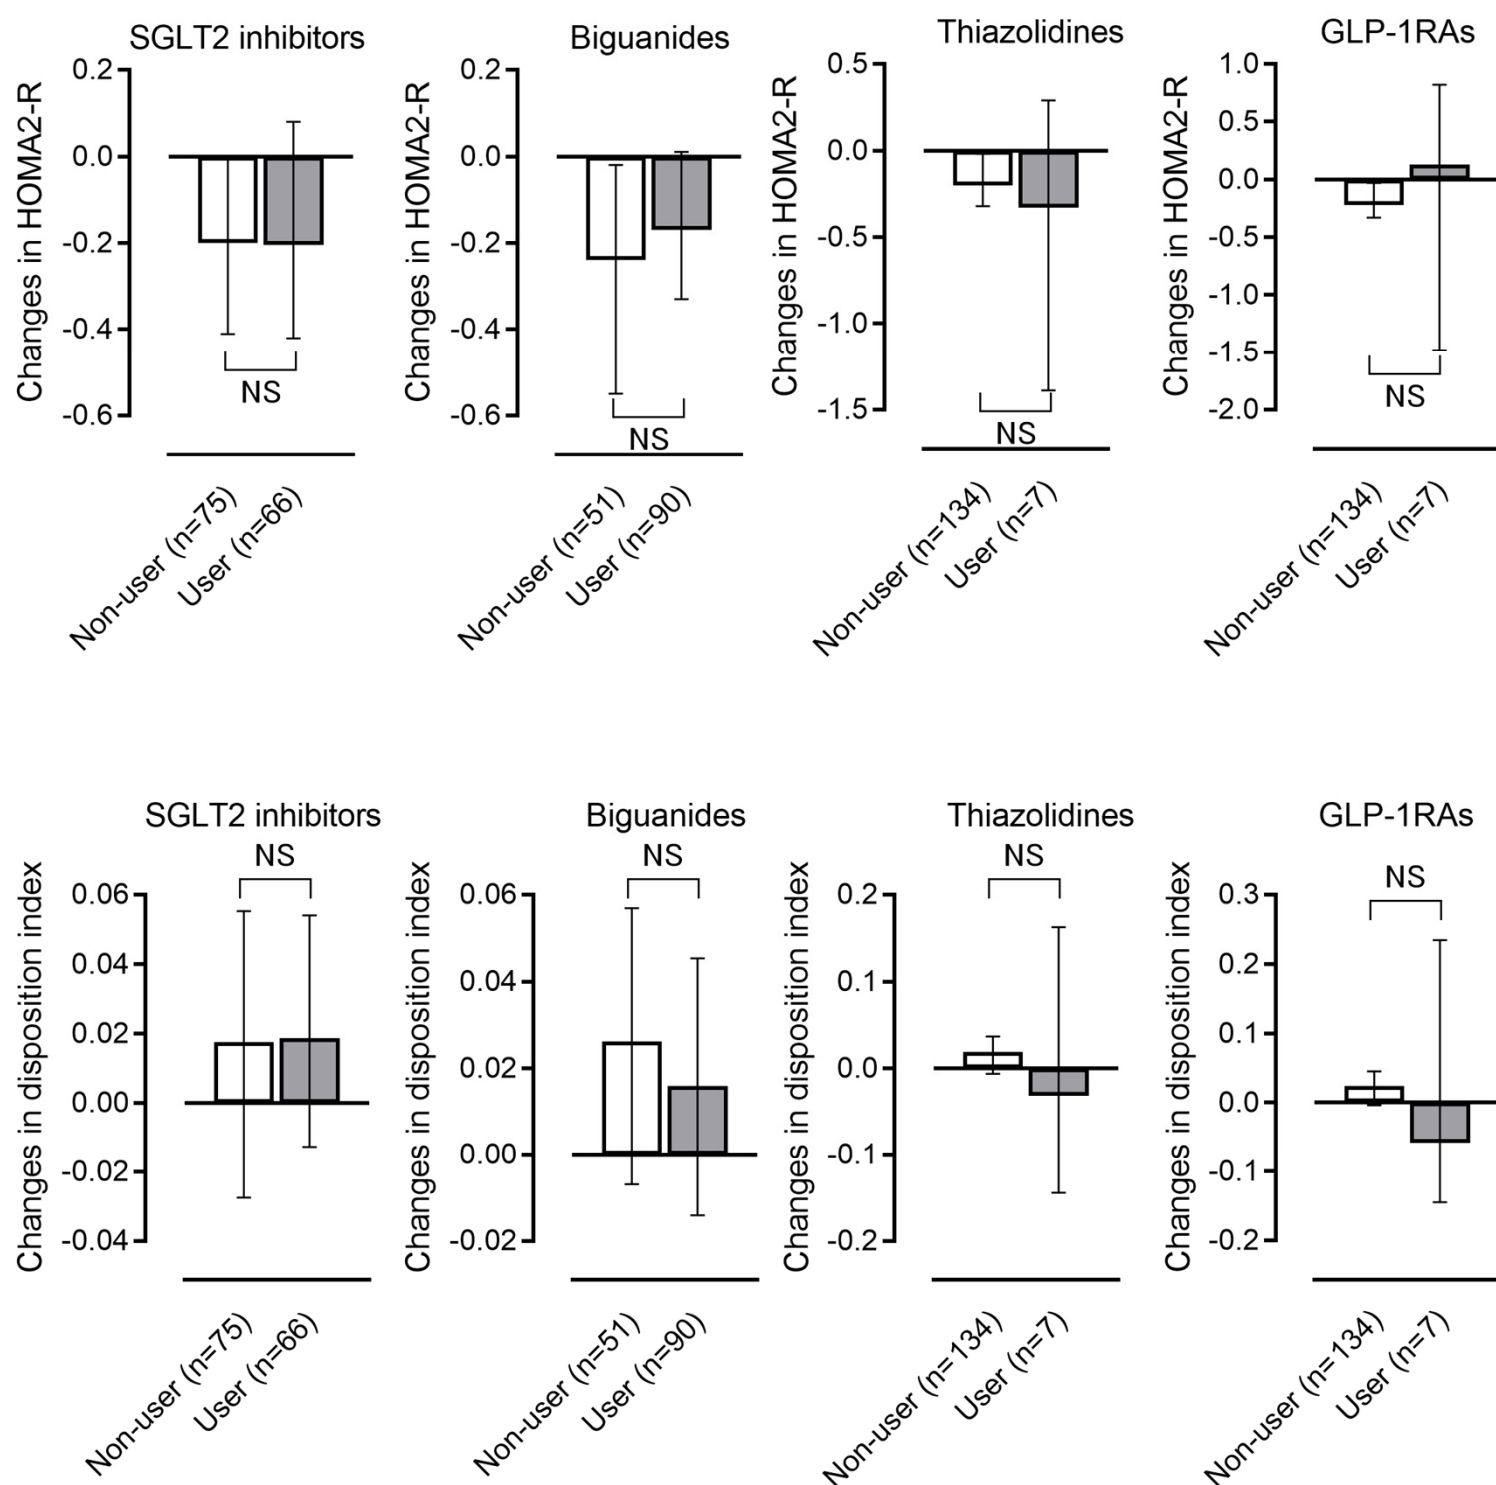

**Supplementary Figure S1.** Changes in HOMA2-R and disposition by concomitant medication for diabetes in the pemafibrate group from baseline. Data are shown as the median change (95% confidence interval). GLP-1RAs, glucagon-like peptide-1 receptor agonists; SGLT2, sodium glucose cotransporter 2; NS, not significant.
