# Supplementary material for: Favorable Effect of Pemafibrate on Insulin Resistance and β-Cell Function in Subjects with Type 2 Diabetes and Hypertriglyceridemia: A Subanalysis of the PARM-T2D Study
Source: MDPI journal article supplement (doi:10.3390/pharmaceutics15071838), 2023-06-27
Supplement: s1 [file s1]

**Table S1.** Differences in baseline characteristics between the improved group and the deteriorated group based on changes in HOMA2-R in the pemafibrate group during the 52-week study period.

| Variable                          | Improved group<br>(n=83) | Deteriorated group<br>(n=58) | <i>P</i> -value |
|-----------------------------------|--------------------------|------------------------------|-----------------|
| Age (years)                       | 60.1 ± 12.7              | 60.1 ± 11.7                  | 0.979           |
| Female sex                        | 27 (32.5)                | 18 (31.0)                    | 1.000           |
| BMI (kg/m <sup>2</sup> )          | 27.4 ± 4.2               | 27.2 ± 3.8                   | 0.718           |
| FPG (mg/dL)                       | 140.1 ± 32.1             | 128.3 ± 26.3                 | 0.023           |
| HbA1c (%)                         | 7.02 ± 0.84              | 6.79 ± 0.68                  | 0.085           |
| Triglyceride (mg/dL)              | 180 (137, 249)           | 163 (130, 218)               | 0.226           |
| HDL-C (ng/mL)                     | 52.6 ± 12.4              | 52.1 ± 11.2                  | 0.825           |
| AST (IU/L)                        | 32.7 ± 17.5              | 29.8 ± 12.8                  | 0.281           |
| ALT (IU/L)                        | 31 (21, 48)              | 29 (19, 43)                  | 0.404           |
| γ-GTP (IU/L)                      | 45 (31, 84)              | 34 (22, 56)                  | 0.007           |
| eGFR (mL/min/1.73m <sup>2</sup> ) | 71.1 ± 20.1              | 67.4 ± 15.4                  | 0.941           |
| HOMA2-R                           | 2.30 (1.74, 3.14)        | 1.75 (1.32, 2.37)            | <0.001          |
| HOMA2-β                           | 74.4 (61.1, 90.6)        | 76.5 (53.1, 97.7)            | 0.695           |
| Fibrates                          | 28 (33.7)                | 24 (41.4)                    | 0.379           |
| Statins                           | 60 (72.3)                | 39 (67.2)                    | 0.576           |
| α-glucosidase inhibitors          | 0 (0)                    | 2 (3.4)                      | 0.168           |
| Biguanides                        | 50 (60.2)                | 40 (69.0)                    | 0.373           |
| DPP-4 inhibitors                  | 35 (42.2)                | 31 (53.4)                    | 0.234           |
| GLP-1 receptor agonists           | 3 (3.6)                  | 4 (6.9)                      | 0.446           |
| SGLT2 inhibitors                  | 37 (44.6)                | 29 (50.0)                    | 0.608           |
| Thiazolidines                     | 4 (4.8)                  | 3 (5.2)                      | 1.000           |

Data are shown as mean ± SD, median (25% percentile, 75% percentile), or number (%). *P*-values for pemafibrate group versus control group were obtained using Student's *t*-test, the Mann–Whitney test, or Fisher's exact test. BMI, body mass index; FPG, fasting plasma glucose; HbA1c, glycated hemoglobin; HDL-C, high-density lipoprotein cholesterol; AST, aspartate aminotransferase; ALT, alanine aminotransferase; ALP, alkaline phosphatase; γ-GTP, γ-glutamyl transpeptidase; eGFR, estimated glomerular filtration rate; HOMA, Homeostatic model assessment; DPP-4, dipeptidyl peptidase-4; GLP-1, glucagon-like peptide-1; SGLT2, sodium glucose cotransporter 2.

**Table S2.** Differences in baseline characteristics between the improved group and the deteriorated group based on changes in disposition index in the pemafibrate group during the 52-week study period.

| Variable                          | Improved group<br>(n=79) | Deteriorated group<br>(n=62) | P-value |
|-----------------------------------|--------------------------|------------------------------|---------|
| Age (years)                       | 60.0 ± 12.7              | 60.2 ± 11.8                  | 0.930   |
| Female sex                        | 30 (38.0)                | 15 (24.2)                    | 0.102   |
| BMI (kg/m <sup>2</sup> )          | 27.4 ± 4.2               | 27.3 ± 3.8                   | 0.920   |
| FPG (mg/dL)                       | 142.6 ± 34.8             | 126.8 ± 19.8                 | <0.001  |
| HbA1c (%)                         | 7.08 ± 0.88              | 6.72 ± 0.59                  | 0.007   |
| Triglyceride (mg/dL)              | 171 (132, 237)           | 170 (138, 232)               | 0.935   |
| HDL-C (ng/mL)                     | 52.5 ± 11.6              | 52.2 ± 12.3                  | 0.888   |
| AST (IU/L)                        | 32.1 ± 16.9              | 30.8 ± 14.2                  | 0.640   |
| ALT (IU/L)                        | 30 (21, 54)              | 30 (20, 41)                  | 0.443   |
| γ-GTP (IU/L)                      | 44 (24, 84)              | 35 (25, 64)                  | 0.377   |
| eGFR (mL/min/1.73m <sup>2</sup> ) | 71.7 ± 20.8              | 66.8 ± 14.2                  | 0.112   |
| HOMA2-R                           | 2.30 (1.66, 3.09)        | 1.97 (1.39, 2.59)            | 0.033   |
| Disposition index                 | 0.33 (0.25, 0.44)        | 0.38 (0.30, 0.49)            | 0.004   |
| Fibrates                          | 23 (29.1)                | 29 (46.8)                    | 0.036   |
| Statins                           | 58 (73.4)                | 41 (66.1)                    | 0.360   |
| α-glucosidase inhibitors          | 0 (0)                    | 0 (0)                        | 1.000   |
| Biguanides                        | 50 (63.3)                | 40 (64.5)                    | 1.000   |
| DPP-4 inhibitors                  | 35 (44.3)                | 31 (50.0)                    | 0.610   |
| GLP-1 receptor agonists           | 1 (1.3)                  | 6 (9.7)                      | 0.446   |
| SGLT2 inhibitors                  | 37 (46.8)                | 29 (46.8)                    | 1.000   |
| Thiazolidines                     | 3 (3.8)                  | 4 (6.5)                      | 0.699   |

Data are shown as mean ± SD, median (25% percentile, 75% percentile), or number (%). *P*-values for pemafibrate group versus control group were obtained using Student's *t*-test, the Mann–Whitney test, or Fisher's exact test. BMI, body mass index; FPG, fasting plasma glucose; HbA1c, glycated hemoglobin; HDL-C, high-density lipoprotein cholesterol; AST, aspartate aminotransferase; ALT, alanine aminotransferase; ALP, alkaline phosphatase; γ-GTP, γ-glutamyl transpeptidase; eGFR, estimated glomerular filtration rate; HOMA, Homeostatic model assessment; DPP-4, dipeptidyl peptidase-4; GLP-1, glucagon-like peptide-1; SGLT2, sodium glucose cotransporter 2.

**Table S3.** Changes from baseline in key endpoints for the participants.

| Variables                            | Pemafibrate (n=141)     | Control (n=138)       | <i>P</i> -value |
|--------------------------------------|-------------------------|-----------------------|-----------------|
|                                      | Mean change at 52 wks   | Mean change at 52 wks |                 |
| Body mass index (kg/m <sup>2</sup> ) | 0.0 (−0.1 to 0.2)       | −0.1 (−0.2 to 0.1)    | 0.489           |
| Total cholesterol (mg/dL)            | −6.4 (−10.4 to −2.4) ** | −1.1 (−5.4 to 3.1)    | 0.076           |
| Triglycerides (mg/dL)                | −46 (−60 to −30) ***    | −14 (−20 to 0) *      | < 0.001         |
| HDL-cholesterol (mg/dL)              | 2.0 (0.3 to 3.8) *      | −0.2 (−1.2 to 0.9)    | 0.035           |
| AST (IU/L)                           | −3.5 (−5.4 to −1.6) *** | 0.7 (−1.4 to 2.7)     | 0.003           |
| ALT (IU/L)                           | −6 (−9 to −4) ***       | −1 (−2 to 0)          | < 0.001         |
| γ-GTP (IU/L)                         | −10 (−14 to −5) ***     | −1 (−2 to 1)          | < 0.001         |
| eGFR (mL/min/1.73m <sup>2</sup> )    | 2.5 (0.6 to 4.4)        | −0.7 (−2.2 to 0.8)    | 0.009           |

Data are shown as mean or median change (95% confidence interval). *P*-values for pemafibrate group versus control group were obtained using Student's *t*-test, the Mann–Whitney test. \* *P* < 0.05, \*\* *P* < 0.01, \*\*\* *P* < 0.001 vs baseline. AST, aspartate aminotransferase; ALT, alanine aminotransferase; γ-GTP, γ-glutamyl transpeptidase; eGFR, estimated glomerular filtration rate.

**Table S4.** Relationships between changes in indices for glucose metabolism and changes in metabolic parameters in the pemafibrate group evaluated by multiple linear regression analysis.

| $\Delta$ HOMA-2R    | Regression coefficients | 95% confidence interval | <i>P</i> value |
|---------------------|-------------------------|-------------------------|----------------|
| $\Delta$ HDL-C      | −0.058                  | −0.101, −0.022          | 0.003          |
| $\Delta\gamma$ -GTP | 0.004                   | −0.001, 0.009           | 0.113          |
| $\Delta$ ALT        | 0.002                   | −0.011, 0.015           | 0.772          |
| $\Delta$ DI         | Regression coefficients | 95% confidence interval | <i>P</i> value |
| $\Delta$ TG         | −0.00022                | −0.00038, −0.00005      | 0.011          |
| $\Delta$ BMI        | −0.03373                | −0.06252, −0.00494      | 0.022          |
| $\Delta\gamma$ -GTP | −0.00047                | −0.00112, 0.00019       | 0.164          |
| $\Delta$ eGFR       | −0.00138                | −0.00363, 0.00086       | 0.226          |

Multiple linear regression was adjusted for age, sex, high-density lipoprotein cholesterol (HDL-C),  $\gamma$ -glutamyl transpeptidase ( $\gamma$ -GTP) and alanine aminotransferase (ALT) for homeostatic model assessment (HOMA)-2R, and age, sex, triglyceride (TG), body mass index (BMI),  $\gamma$ -GTP, and estimated glomerular filtration rate (eGFR) for disposition index (DI).
